# Supplementary material
Source: PubMed Central journal article supplement (PMC8814170)
Supplement: 41437_2021_493_MOESM1_ESM.pdf [file 41437_2021_493_MOESM1_ESM.pdf]

**SUPPLEMENTARY TABLES**

**Supp Table 1:** Comparison of summary statistics obtained from IAV data (from Foll *et al.* 2014) from simulations with various mutation rates ( $\mu$ ) assumed. For each mutation rate, 200 DFEs were sampled and simulated (with 100 replicates for each). The standard deviation (sd\*) across simulations was calculated across all DFE realizations.

|                      | <b>IAV data</b> |           | <b>Simulations</b>              |            |                                 |            |                                 |            |
|----------------------|-----------------|-----------|---------------------------------|------------|---------------------------------|------------|---------------------------------|------------|
|                      | <b>mean</b>     | <b>sd</b> | $\mu = 10^{-5}/\text{site/gen}$ |            | $\mu = 10^{-4}/\text{site/gen}$ |            | $\mu = 10^{-3}/\text{site/gen}$ |            |
|                      | <b>mean</b>     | <b>sd</b> | <b>mean</b>                     | <b>sd*</b> | <b>mean</b>                     | <b>sd*</b> | <b>mean</b>                     | <b>sd*</b> |
| <b><i>S</i></b>      | 518             | 287       | 50                              | 9          | 330                             | 51         | 795                             | 146        |
| $\pi$                | 0.0096          | 0.0170    | 0.0015                          | 0.0004     | 0.0110                          | 0.0032     | 0.0206                          | 0.0075     |
| $\theta_w$           | 0.0299          | 0.0166    | 0.0029                          | 0.0005     | 0.0190                          | 0.0029     | 0.0459                          | 0.0084     |
| $\theta_H$           | 0.0027          | 0.0067    | 0.0003                          | 0.0002     | 0.0035                          | 0.0019     | 0.0093                          | 0.0060     |
| <b><i>H'</i></b>     | 0.355           | 0.461     | 0.561                           | 0.140      | 0.616                           | 0.172      | 0.507                           | 0.168      |
| <b>Taj. <i>D</i></b> | -2.037          | 1.337     | -1.318                          | 0.330      | -1.262                          | 0.390      | -1.194                          | 0.492      |

  

|                      | <b>min</b> | <b>max</b> | <b>min</b> | <b>max</b> | <b>min</b> | <b>max</b> | <b>min</b> | <b>max</b> |
|----------------------|------------|------------|------------|------------|------------|------------|------------|------------|
| <b><i>S</i></b>      | 48         | 980        | 3.329      | 81.87      | 57.85      | 653.8      | 36.06      | 1801       |
| $\pi$                | 0.0005     | 0.0564     | 0.0001     | 0.0026     | 0.0018     | 0.0234     | 0.0022     | 0.1005     |
| $\theta_w$           | 0.0028     | 0.0566     | 0.0002     | 0.0047     | 0.0033     | 0.0378     | 0.0021     | 0.1040     |
| $\theta_H$           | 0.0001     | 0.0241     | 0.0000     | 0.0006     | 0.0006     | 0.0067     | 0.0009     | 0.0418     |
| <b><i>H'</i></b>     | 0.097      | 1.566      | 0.191      | 0.701      | 0.444      | 0.798      | 0.226      | 1.507      |
| <b>Taj. <i>D</i></b> | -2.746     | 1.897      | -1.710     | -0.914     | -1.620     | -0.862     | -2.280     | 1.941      |

**Supp Table 2:** Comparison of summary statistics obtained from HCMV data (from Renzette *et al.* 2013) from simulations with various mutation rates ( $\mu$ ) assumed. For each mutation rate, 20 different DFEs were sampled and simulated (with 100 replicates for each). The standard deviation (sd\*) across simulations was calculated across all DFE realizations.

| HCMV data     |        | Simulations                     |                      |                                 |        |                                 |         |
|---------------|--------|---------------------------------|----------------------|---------------------------------|--------|---------------------------------|---------|
|               |        | $\mu = 10^{-7}/\text{site/gen}$ |                      | $\mu = 10^{-6}/\text{site/gen}$ |        | $\mu = 10^{-5}/\text{site/gen}$ |         |
|               | mean   | mean                            | sd*                  | mean                            | sd*    | mean                            | sd*     |
| <b>S</b>      | 449.0  | 8.9                             | 0.7                  | 72.3                            | 28.5   | 299.882                         | 125.39  |
| $\pi$         | 0.0031 | $7 \times 10^{-5}$              | $4.9 \times 10^{-5}$ | 0.0006                          | 0.0003 | 0.00197                         | 0.0009  |
| $\theta_w$    | 0.0037 | $7 \times 10^{-5}$              | $3.6 \times 10^{-5}$ | 0.0006                          | 0.0002 | 0.00246                         | 0.001   |
| <b>Taj. D</b> | -0.518 | 0.006                           | 0.820                | -0.192                          | 0.656  | -0.6248                         | 0.143   |
|               |        | min                             | max                  | min                             | max    | min                             | max     |
| <b>S</b>      |        | 7.6                             | 10.5                 | 62.2                            | 80.2   | 52.81                           | 475.89  |
| $\pi$         |        | $6 \times 10^{-5}$              | $9 \times 10^{-5}$   | 0.0005                          | 0.0007 | 0.00038                         | 0.0035  |
| $\theta_w$    |        | $6 \times 10^{-5}$              | $9 \times 10^{-5}$   | 0.0005                          | 0.0007 | 0.00043                         | 0.0039  |
| <b>Taj. D</b> |        | -0.151                          | 0.192                | -0.476                          | -0.045 | -0.90509                        | -0.3702 |
